# Supplementary material for: Genetic Signatures in the Envelope Glycoproteins of HIV-1 that Associate with Broadly Neutralizing Antibodies
Source: PLoS Comput Biol. 2010 Oct 7;6(10):e1000955. doi: 10.1371/journal.pcbi.1000955 (PMC2951345; doi:10.1371/journal.pcbi.1000955)
Supplement: Table S1 — This table includes a description of the 251 sequences of the pseudotyped viruses used for defining the b12 signatures, as well as the 56 sequences included in the blinded set used to test whether the signature could be used to predict b12 sensitivity. It includes strain name, HIV-1 subtype or recombinant status, country of origin, year, Fiebig stage, modes of transmission, specimen and GenBank accession number. A blank means the field is unknown. (0.07 MB XSLX) [file pcbi.1000955.s003.xlsx]

## Sheet: TableS1revised.xls
Name	Clade	Country	Year	Fiebig Stage	Mode of Transmission	Specimen Source	Accession Number
Q23_17_	A	Kenya		VI	M to F		AF004885
Q259_d2_17_	A	Kenya		Acute/early	M to F		AF407152
Q769_d22_	A	Kenya		Acute/early	M to F		AF407158
Q842_d12_	A	Kenya		Acute/early	M to F		AF407160
MS208_A1	A	Montserrat		VI			DQ187010
0260_v5_c1	A	Tanzania	2005	V/VI	Heterosexual	Plasma	HM215255
0330_v4_c3	A	Tanzania	2005	V/VI	Heterosexual	Plasma	HM215257
3365_v2_c20	A	Tanzania	2004	V/VI	Heterosexual	Plasma	HM215298
3415_v1_c1	A	Tanzania	2003	V/VI	Heterosexual	Plasma	HM215299
3718_v3_c11	A	Tanzania	2004	I/II	Heterosexual	Plasma	HM215306
398_F1_F6_20	A	Tanzania		VI	Heterosexual	Plasma	HM215312
783_v0_c51	A	Tanzania	2002	I/II	Heterosexual	Plasma	HM215347
191955_A11	A	Uganda	2007	IV	Heterosexual	Plasma	HM215272
9004SS_A3_4	A	Uganda	2007	IV	Heterosexual	Plasma	HM215350
T280_5	A/CRF02_AG	Cameroon		Chronic		ccPBMC	EU513183
191084_B7_19	A	Uganda	2007	IV	Heterosexual	Plasma	HM215266
246_F3_C10_2	AC	Tanzania		VI	Heterosexual	Plasma	HM215279
3301_v1_c24	AC	Tanzania	2003	I/II	Heterosexual	Plasma	HM215294
3301_v2_c6	AC	Tanzania	2004	Early	Heterosexual	Plasma	HM215295
3589_v1_c4	AC	Tanzania	2003	V/VI	Heterosexual	Plasma	HM215304
477_F3_13_55	AC	Tanzania			Heterosexual	Plasma	HM215315
6041_v3_c23	AC	Tanzania	2004	I/II	Heterosexual	Plasma	HM215321
6540_v4_c1	AC	Tanzania	2004	Early	Heterosexual	Plasma	HM215330	*6540 and 6545 are thought to be an epidemiologically linked pair, with very similar virus
6545_v3_c13	AC	Tanzania	2004	V/VI	Heterosexual	Plasma	HM215331	*6540 and 6545 are thought to be an epidemiologically linked pair, with very similar virus
6545_v4_c1	AC	Tanzania	2005	Early	Heterosexual	Plasma	HM215332
0815_v3_c3	ACD	Tanzania	2004	V/VI	Heterosexual	Plasma	HM215260
3103_v3_c10	ACD	Tanzania	2004	V/VI	Heterosexual	Plasma	HM215288
6095_v1_c10	ACD	Tanzania	2003	V/VI	Heterosexual	Plasma	HM215323
Q461_e2_	AD	Kenya		Acute/early	M to F		AF407156
0907_v4_c12	AD	Tanzania	2005	V/VI	Heterosexual	Plasma	HM215261
3468_v1_c12	AD	Tanzania	2003	V/VI	Heterosexual	Plasma	HM215301
192018_B1_9	AD	Uganda	2007	IV	Heterosexual	Plasma	HM215273
193003_B10	AD	Uganda	2007	VI	Heterosexual	Plasma	HM215274
270015_J5_1	AD	Uganda	2006	VI	Heterosexual	Plasma	HM215280
1105_p17_1	AG	Senegal	1999	VI		Plasma	HM215264
2705_p18_1	AG	Senegal	2000	VI		Plasma	HM215281
2843_p5_1	AG	Senegal	1999	VI		Plasma	HM215282
3169_p4	AG	Senegal	1999	VI		Plasma	HM215290
3226_p15	AG	Senegal	1999	VI		Plasma	HM215291
3233_p12	AG	Senegal	2001	VI		Plasma	HM215292
3273_p21_1	AG	Senegal	1999	VI		Plasma	HM215293
BZ167_12	B	Brazil		VI		ccPBMC	GQ855764
BJOX003000_19_1	B	China/Beijing	2007	II	MSM	Plasma	HM215365
BJOX020000_03_3	B	China/Beijing	2007	II	MSM	Plasma	HM215382
B02	B	China/Gansu	2003	V/VI	Blood	Plasma	EU363826
B01	B	China/Hebei	2003	V/VI	Blood	Plasma	EU363825
B03	B	China/Hebei	2003	V/VI	Sexual	Plasma	EU363827
B04	B	China/Hebei	2006	V/VI	Blood	Plasma	EU363828
B05	B	China/Hebei	2006	V/VI	Blood	Plasma	EU363829
Bx08_16	B	France		VI		ccPBMC	GQ855765
HXB2	B	France		Chronic	MSM		K03455
PVO_4_	B	Italy	1994	III	MSM	ccPBMC	AY835444
TRO_11_	B	Italy	1995	III	MSM	ccPBMC	AY835445
H022_7	B	Peru		VI	Sexual	ccPBMC	EF210725
H029_12	B	Peru		VI	Sexual	ccPBMC	EF210726
H030_7	B	Peru		VI	Sexual	ccPBMC	EF210727
H031_7	B	Peru		VI	Sexual	ccPBMC	EF210728
H035_18	B	Peru		VI	Sexual	ccPBMC	EF210729
H061_14	B	Peru		VI	Sexual	ccPBMC	EF210730
H077_31	B	Peru		VI	Sexual	ccPBMC	EF210734
H078_14	B	Peru		VI	Sexual	ccPBMC	EF210733
H079_2	B	Peru		VI	Sexual	ccPBMC	EF210731
H080_23	B	Peru		VI	Sexual	ccPBMC	EF210735
H086_8	B	Peru		VI	Sexual	ccPBMC	EF210732
NKR_0512_8	B	Thailand				ccPBMC	HM215431
RPW_0510_2	B	Thailand				ccPBMC	HM215435
QH0515_1	B	Trinidad	1994	IV	F to M	ccPBMC	AY835440
QH0692_42_	B	Trinidad	1994	V	F to M	ccPBMC	AY835439
SC05_8C11_2344	B	Trinidad	1993	II	Heterosexual	Plasma	EU289200
SC422661_8_	B	Trinidad	1995	IV	F to M	Plasma	AY835441
SC45_4B5_2631	B	Trinidad	1995	II	Heterosexual	Plasma	EU289201
TT29P_3A1_2769	B	Trinidad	1998		Heterosexual	Plasma	EU577190
TT31P_2F10_2792	B	Trinidad	1998	II	Heterosexual	Plasma	EU577213
1006_11_C3_1601	B	USA	1997	III		Plasma	EU289183
1012_11_TC21_3257	B	USA	1997	III		Plasma	EU289184
1051_12_C22_3325	B	USA	1997	II		Plasma	EU575148
1051_12_TD12_3291	B	USA	1997	II		Plasma	EU575170
1054_07_TC4_1499	B	USA	1997	II		Plasma	EU289185
1056_10_TA11_1826	B	USA	1998	II		Plasma	EU289186
1058_11_B11_1550	B	USA	1998	IV		Plasma	EU289187
1059_09_A4_1460	B	USA	1998	III		Plasma	EU289188
6101_10	B	USA	1994	V	MSM	ccPBMC	AY835434
62357_14_D3_4589	B	USA	1996	II		Plasma	EU289189
6240_08_TA5_4622	B	USA	1995	II		Plasma	EU289190
6244_13_B5_4576	B	USA	1996	II		Plasma	EU289191
63358_04_P3_4013	B	USA	1997	II		Plasma	EU289192
6535_3_	B	USA	1995	V	MSM	ccPBMC	AY835438
700010040_C9_4520	B	USA	2006	V	MSM	Plasma	EU289193
700010058_A4_4375	B	USA	2006	III	MSM	Plasma	EU289194
9014_01_TB1_4769	B	USA	1997	II		Plasma	EU575786
9020_20_A13_4607	B	USA	1998	II		Plasma	EU575870
9021_14_B2_4571	B	USA	1998	II		Plasma	EU289196
AC10_0_29_	B	USA	1998	III	MSM	ccPBMC	AY835446
Bal_26	B	USA		VI	Mother to child	Lung	DQ318211
BG1168_1	B	USA	1996	III	MSM	ccPBMC	AY835443
BORI_d9_4D7_1410	B	USA	1990	II	MSM	Plasma	EU576296
BORI_d9_4F8_1413	B	USA	1990	II	MSM	Plasma	EU576299
CAAN5342_A2_	B	USA	2004	VI	MSM	Plasma	AY835452
MN_3	B	USA		VI			HM215430
PRB926_04_A9_4237	B	USA	1994	II		Plasma	EU289197
PRB931_06_TC3_4930	B	USA	1995	III		Plasma	EU289198
PRB958_06_TB1_4305	B	USA	2000	III		Plasma	EU289199
REJO4541_67_	B	USA	2001	II	F to M	Plasma	AY835449
RHPA4259_7_	B	USA	2000	V	M to F	Plasma	AY835447
SF162_LS	B	USA		VI			EU123924
SS1196_1	B	USA	1997	V/VI	MSM	ccPBMC	AY835442
SUMA_d5_8_2	B	USA	1991	II	MSM	Plasma	EU577073
THRO4156_18_	B	USA	2000	II	MSM	Plasma	AY835448
TRJO4551_58_	B	USA	2001	II	MSM	Plasma	AY835450
WEAU_d15_410_5017	B	USA	1990	II	MSM	Plasma	EU289202
WITO4160_33_	B	USA	2000	II	F to M	Plasma	AY835451
ACH320-W61D-TCLA	B						HM215359
CNE9	B'	China/Henan	2005	VI	Heterosexual	PBMC	HM215428
CNE11	B'	China/Jilin	2005	VI	Blood	PBMC	HM215398
CNE12	B'	China/Jilin	2004	VI	Heterosexual	PBMC	HM215399
CNE14	B'	China/Jilin	2004	VI	Heterosexual	PBMC	HM215400
CNE10	B'	China/Liaoning	2004	VI	Blood	PBMC	HM215397
CNE57	B'	China/Liaoning	2005	VI	MSM	PBMC	HM215420
CNE4	B'	China/Yunnan	2006	VI	IDU	PBMC	HM215413
CNE6	B'	China/Yunnan	2006	VI	IDU	PBMC	HM215423
CNE15	BC	China/Yunnan	2007	VI	IDU	PBMC	HM215401
CNE16	BC	China/Yunnan	2007	VI	IDU	PBMC	HM215402
CNE18	BC	China/Yunnan	2007	VI	IDU	PBMC	HM215404
CNE40	BC	China/Yunnan	2007	VI	IDU	PBMC	HM215414
CNE67	BC	China/Yunnan	2007	VI	IDU	PBMC	HM215425
CNE7	BC	China/Yunnan	2006	VI	IDU	PBMC	HM215426
92BR025_9	C	Brazil		VI			U15121
CNE17	C	China/Yunnan	2007	VI	IDU	PBMC	HM215403
CNE23	C	China/Yunnan	2007	VI	IDU	PBMC	HM215408
CNE30	C	China/Yunnan	2007	VI	IDU	PBMC	HM215411
CNE31	C	China/Yunnan	2007	VI	IDU	PBMC	HM215412
CNE52	C	China/Yunnan	2007	VI	IDU	PBMC	HM215416
CNE53	C	China/Yunnan	2007	VI	IDU	PBMC	HM215417
CNE58	C	China/Yunnan	2006	VI	IDU	PBMC	HM215421
HIV_0013095_2_11_	C	India	2000	IV	M to F	ccPBMC	EF117267
HIV_001428_2_42_	C	India	2000	IV	M to F	ccPBMC	EF117266
HIV_00836_2_5_	C	India	2000	VI	M to F	ccPBMC	EF117265
HIV_16055_2_3_	C	India	1999	II	F to M	ccPBMC	EF117268
HIV_16845_2_22_	C	India	2000	V	M to F	ccPBMC	EF117269
HIV_16936_2_21_	C	India	2000	III	F to M	ccPBMC	EF117270
HIV_25710_2_43_	C	India	1999	V	F to M	ccPBMC	EF117271
HIV_25711_2_4_	C	India	1999	III	F to M	ccPBMC	EF117272
HIV_25925_2_22_	C	India	1999	III	F to M	ccPBMC	EF117273
HIV_26191_2_48_	C	India	2000	III	F to M	ccPBMC	EF117274
1394C9G1_Rev_	C	Malawi	2004	I/II	Heterosexual	plasma	FJ444529
2010F5_Rev_	C	Malawi	2005	IV	Heterosexual	Plasma	FJ444553,
703010054_2_A2	C	Malawi	2007	V/VI	Sexual	Plasma	FJ443808
7030100542A2_Rev_	C	Malawi	2007	V/VI	Heterosexual	Plasma	FJ443808
7030102001E5_Rev_	C	Malawi	2007	I/II	Heterosexual	Plasma	FJ443999
703010217_B6	C	Malawi	2007	V/VI	Sexual	Plasma	FJ443999
703010217B6_Rev_	C	Malawi	2007	V	Heterosexual	Plasma	HM215346
703010228_1C4	C	Malawi	2007	I/II	Sexual	Plasma	FJ444017
BF1266_431a	C	Malawi			breastfeeding	Plasma	HM215352
BF1677F2_613a	C	Malawi			breastfeeding	Plasma	HM215361
CenvFs2_pt0682_E4uncp	C	Malawi	2003	I/II	Sexual	Plasma	FJ444325
CenvFs2_pt0985_H7uncp	C	Malawi	2004	I/II	Sexual	Plasma	FJ444384
CenvFs2_Pt1086_B2	C	Malawi	2004	I/II	Sexual	Plasma	FJ444395
CenvFs2_pt1172_H1uncp	C	Malawi	2004	I/II	Sexual	Plasma	FJ444421
CenvFs2_Pt1176_A3	C	Malawi	2004	I/II	Sexual	Plasma	FJ444437
CenvFs2_pt2060_G9uncp	C	Malawi	2005	I/II	Sexual	Plasma	FJ444600
CenvFs2_pt2103_E8uncp	C	Malawi	2005	I/II	Sexual	Plasma	FJ444612
CenvFs4_Pt0393_C3	C	Malawi	2003	IV	Sexual	Plasma	FJ444215
CenvFs4_Pt2010_F5	C	Malawi	2005	IV	Sexual	Plasma	FJ444561
MW965_26	C	Malawi		VI	M to F	ccPBMC	U08455
704010042_2_E5	C	South Africa	2007	IV	Sexual	Plasma	FJ443744
704010083_B8	C	South Africa	2007	III	Sexual	Plasma	FJ443670
704809221_1B3	C	South Africa	2007	I/II	Sexual	Plasma	FJ444103
7048092211B3_Rev_	C	South Africa	2007	I/II	Heterosexual	Plasma	FJ444103
706010018_2E3	C	South Africa	2007	VI	Sexual	Plasma	FJ444047
706010164_1A7	C	South Africa	2007	IV	Sexual	Plasma	FJ444059
7060101641A7_Rev_	C	South Africa	2007	I/II	Heterosexual	Plasma	FJ444059
CAP210_2_00_E8_	C	South Africa	2005	IV	M to F	Plasma	DQ435683
CAP244_2_00_D3	C	South Africa	2005	V	M to F	Plasma	DQ435684
CAP45_2_00_G3_	C	South Africa	2005	IV	M to F	Plasma	DQ435682
Du123_6	C	South Africa	1998	VI	M to F	ccPBMC	DQ411850
Du151_2	C	South Africa	1998	V	M to F	ccPBMC	DQ411851
Du156_12_	C	South Africa	1999	IV	M to F	ccPBMC	DQ411852
Du172_17_	C	South Africa	1998	VI	M to F	ccPBMC	DQ411853
Du422_1_	C	South Africa	1998	V	M to F	ccPBMC	DQ411854
TV1_21	C	South Africa		VI			HM215437
0041_v3_c18	C	Tanzania	2004	V/VI	Heterosexual	Plasma	HM215253
0921_v2_c14	C	Tanzania	2004	V/VI	Heterosexual	Plasma	HM215262
234_F1_16_57	C	Tanzania		V	Heterosexual	Plasma	HM215278
3168_v4_c10	C	Tanzania	2005	V/VI	Heterosexual	Plasma	HM215289
3637_v5_c3	C	Tanzania	2005	V/VI	Heterosexual	Plasma	HM215305
3728_v2_c6	C	Tanzania	2004	III/IV	Heterosexual	Plasma	HM215307
3873_v1_c24	C	Tanzania	2003	V/VI	Heterosexual	Plasma	HM215311
410_F2_1_30	C	Tanzania		VI	Heterosexual	Plasma	HM215314
541_F1_A7_2	C	Tanzania		V/VI	Heterosexual	Plasma	HM215316
569_F1_37_10	C	Tanzania					HM215318
6022_v7_c24	C	Tanzania	2006	Early	Heterosexual	Plasma	HM215319
6040_v4_c15	C	Tanzania	2005	V/VI	Heterosexual	Plasma	HM215320
6322_v4_c1	C	Tanzania	2005	V/VI	Heterosexual	Plasma	HM215326
6471_v1_c16	C	Tanzania	2003	V/VI	Heterosexual	Plasma	HM215328
6631_v3_c10	C	Tanzania	2004	V/VI	Heterosexual	Plasma	HM215335
6644_v2_c33	C	Tanzania	2004	V/VI	Heterosexual	Plasma	HM215336
6785_v5_c14	C	Tanzania	2005	V/VI	Heterosexual	Plasma	HM215338
6838_v1_c35	C	Tanzania	2003	I/II	Heterosexual	Plasma	HM215341
6980_v1_c17_	C	Tanzania	2003	Early	Heterosexual	Plasma	HM215345
933_v4_c4	C	Tanzania	2005	Early	Heterosexual	Plasma	HM215352
98_F4_H5_13	C	Tanzania		V	Heterosexual	Plasma	HM215354
98_v3_c5	C	Tanzania	2004	Early	Heterosexual	Plasma	HM215355
PWJ_0513_39	C	Thailand				ccPBMC	HM215433
246F_C1G	C	Zambia	2003	II	M to F	Plasma	FJ496194
249M_B10	C	Zambia	2003	IV	F to M	Plasma	EU166866
96ZM651_02	C	Zambia		VI			AF286224
ZM106F_PB9	C	Zambia	1998	VI	M to F	ucPBMC	AY424163
ZM109F_PB4_	C	Zambia	2000	VI	M to F	ucPBMC	AY424138
ZM135M_PL10a_	C	Zambia	1998	VI	F to M	Plasma	AY424079
ZM197M_PB7_	C	Zambia	2002	VI	F to M	ucPBMC	DQ388515
ZM214M_PL15_	C	Zambia	2003	VI	F to M	Plasma	DQ388516
ZM215F_PB8	C	Zambia	2002	VI	M to F	ucPBMC	DQ422948
ZM233M_PB6_	C	Zambia	2002	VI	F to M	ucPBMC	DQ388517
ZM247v1_Rev_	C	Zambia	2003	II	Heterosexual	Plasma	FJ496204
ZM249M_PL1_	C	Zambia	2003	II	F to M	Plasma	DQ388514
ZM53M_PB12_	C	Zambia	2000	VI	F to M	ucPBMC	AY423984
ZM55F_PB28a	C	Zambia	1998	VI	M to F	ucPBMC	AY423971
3326_v4_c3	CD	Tanzania	2005	V/VI	Heterosexual	Plasma	HM215296
3337_v2_c6	CD	Tanzania	2004	V/VI	Heterosexual	Plasma	HM215297
3817_v2_c59	CD	Tanzania	2004	Early	Heterosexual	Plasma	HM215310
401_F1_8_10	CD	Tanzania		VI	Heterosexual	Plasma	HM215313
6480_v4_c25	CD	Tanzania	2004	Early	Heterosexual	Plasma	HM215329
6650_v1_c8	CD	Tanzania	2003	V/VI	Heterosexual	Plasma	HM215337
6811_v7_c18	CD	Tanzania	2006	Early	Heterosexual	Plasma	HM215340
6952_v1_c20	CD	Tanzania	2003	Early	Heterosexual	Plasma	HM215343
BJOX005000_09_2	CRF01_AE	China/Beijing	2007	II	MSM	Plasma	HM215367
BJOX009000_02_4	CRF01_AE	China/Beijing	2007	IV	MSM	Plasma	HM215372
BJOX010000_06_2	CRF01_AE	China/Beijing	2007	II	MSM	Plasma	HM215373
BJOX025000_01_1	CRF01_AE	China/Beijing	2007	II	MSM	Plasma	HM215386
BJOX028000_10_3	CRF01_AE	China/Beijing	2007	II	MSM	Plasma	HM215389
AE01	CRF01_AE	China/Guangdong,	1999	V/VI	Blood	Plasma	EU363849
CNE5	CRF01_AE	China/Henan	2006	VI	Heterosexual	PBMC	HM215415
AE03	CRF01_AE	China/Shanghai	2005	V/VI	Sexual	Plasma	EU363851
AE02	CRF01_AE	China/Yunnan	2006	V/VI	IDU	Plasma	EU363850
CNE28	CRF01_AE	China/Yunnan	2007	VI	IDU	PBMC	HM215409
CNE3	CRF01_AE	China/Yunnan	2006	VI	IDU	PBMC	HM215410
CNE55	CRF01_AE	China/Yunnan	2007	VI	IDU	PBMC	HM215418
CNE56	CRF01_AE	China/Yunnan	2007	VI	IDU	PBMC	HM215419
CNE59	CRF01_AE	China/Yunnan	2006		IDU	PBMC	HM215422
CNE8	CRF01_AE	China/Yunnan	2006	VI	IDU	PBMC	HM215427
C1080rsga_c3	CRF01_AE	Thailand	1999	>VI	Heterosexual	Plasma
KSS_0514_13	CRF01_AE	Thailand				ccPBMC	HM215429
PSR_0508_2	CRF01_AE	Thailand				ccPBMC	HM215432
R1166rsga_c1	CRF01_AE	Thailand	1998	>VI	Heterosexual	Plasma
R2184rsga_c4	CRF01_AE	Thailand	2001	>VI	Heterosexual	Plasma
R3265rsga_c6	CRF01_AE	Thailand	1999	>VI	Heterosexual	Plasma
SPK_0525_13	CRF01_AE	Thailand				ccPBMC	HM215436
211_9_	CRF02_AG	Cameroon		Chronic		ccPBMC	EU513187
235_47_	CRF02_AG	Cameroon		Chronic		ccPBMC	EU513195
242_14_	CRF02_AG	Cameroon		Chronic		ccPBMC	EU513188
263_8_	CRF02_AG	Cameroon		Chronic		ccPBMC	EU513182
269_12	CRF02_AG	Cameroon		Chronic		ccPBMC	EU513194
271_11_	CRF02_AG	Cameroon		Acute/early		ccPBMC	EU513197
T250_4_	CRF02_AG	Cameroon		Chronic		ccPBMC	EU513189
T251_18_	CRF02_AG	Cameroon		Chronic		ccPBMC	EU513196
T253_11	CRF02_AG	Cameroon		Chronic		ccPBMC	EU513191
T255_34_	CRF02_AG	Cameroon		Chronic		ccPBMC	EU513184
T257_31_	CRF02_AG	Cameroon		Acute/early		ccPBMC	EU513185
T266_60	CRF02_AG	Cameroon		Chronic		ccPBMC	EU513193
T278_50_	CRF02_AG	Cameroon		Chronic		ccPBMC	EU513198
T33_7_	CRF02_AG	Cameroon		Chronic		ccPBMC	EU513186
928_28_	CRF02_AG	Cote d'Ivoire		Acute/early		ccPBMC	EU513199
DJ263_8	CRF02_AG	Djibouti		VI	Sexual	ccPBMC	AF063223
1656_p21	CRF06_cpx	Senegal	1999	VI		Plasma	HM215265
CH038_12	CRF07_BC	China	2004	VI	IDU	ccPBMC	EF042692
CH064_20	CRF07_BC	China	2004	VI	IDU	ccPBMC	EF117254
CH070_1	CRF07_BC	China	2004	VI	IDU	ccPBMC	EF117255
CH091_9	CRF07_BC	China	2003	VI	IDU	ccPBMC	EF117256
CH110_2	CRF07_BC	China	2004	VI	IDU	ccPBMC	EF117257
CH111_8	CRF07_BC	China	2004	VI	IDU	ccPBMC	EF117258
CH114_8	CRF07_BC	China	2004	VI	IDU	ccPBMC	EF117264
CH115_12	CRF07_BC	China	2004	VI	IDU	ccPBMC	EF117263
CH117_4	CRF07_BC	China	2004	VI	IDU	ccPBMC	EF117262
CH119_10	CRF07_BC	China	2004	VI	IDU	ccPBMC	EF117261
CH120_6	CRF07_BC	China	2004	VI	IDU	ccPBMC	EF117260
CH181_12	CRF07_BC	China	2004	VI	IDU	ccPBMC	EF117259
BC14	CRF07_BC	China/Beijing	2003	V/VI	Sexual	Plasma	EU363844
BC15	CRF07_BC	China/Beijing	2003	V/VI	Sexual	Plasma	EU363845
BJOX002000_03_2	CRF07_BC	China/Beijing	2007	I/II	MSM	Plasma	HM215364
BC04	CRF07_BC	China/Sichuan	2007	V/VI	IDU	Plasma	EU363834
BC05	CRF07_BC	China/Sichuan	2007	V/VI	IDU	Plasma	EU363835
BC03	CRF07_BC	China/Xinjiang	2003	V/VI	IDU	Plasma	EU363833
BC18	CRF07_BC	China/Xinjiang	2005	V/VI	IDU	Plasma	EU363848
CNE19	CRF07_BC	China/Xinjiang	2007	VI	Heterosexual	PBMC	HM215405
CNE20	CRF07_BC	China/Xinjiang	2007	VI	Heterosexual	PBMC	HM215406
CNE21	CRF07_BC	China/Xinjiang	2007	VI	Heterosexual	PBMC	HM215407
BC07	CRF07_BC	China/Yunnan	2005	V/VI	IDU	Plasma	EU363837
BC09	CRF07_BC	China/Yunnan	2003	V/VI	Sexual	Plasma	EU363839
BC10	CRF07_BC	China/Yunnan	2005	V/VI	IDU	Plasma	EU363840
BC01	CRF08_BC	China/Yunnan	2006	V/VI	IDU	Plasma	EU363831
BC06	CRF08_BC	China/Yunnan	2005	V/VI	IDU	Plasma	EU363836
BC08	CRF08_BC	China/Yunnan	2006	V/VI	IDU	Plasma	EU363838
BC11	CRF08_BC	China/Yunnan	2005	V/VI	IDU	Plasma	EU363841
BC17	CRF08_BC	China/Yunnan	2006	V/VI	IDU	Plasma	EU363847
X2252_c7	CRF14_BG	Portugal	2007	Chronic	Heterosexual	Plasma	EU885766
X1100_c7	CRF14_BG	Switzerland	2002		IDU	Plasma	EU885760
3016_v5_c45	D	Tanzania	2005	I/II	Heterosexual	Plasma	HM215283
6405_v4_c34	D	Tanzania	2004	Early	Heterosexual	Plasma	HM215327
A07412M1_vrc12	D	Uganda	1999			ccPBMC	HM215357
X2088_c9	G	Ghana	2006	Chronic	Heterosexual	Plasma	EU885764
P0402_c2_11	G	Portugal	2002	Chronic	Heterosexual	Plasma	EU885759
X1193_c1	G	Spain	2002	Chronic	IDU	Plasma	EU885761
X1254_c3	G	Spain	2003	Chronic	IDU	Plasma	EU885762
X1854_c2_10	G	Spain	2005	V/VI	IDU	Plasma	EU885763
X2160_c25	G	Spain	2007	Chronic	IDU	Plasma	EU885765
252_7	G	W. Africa		VI			EU513190
UNC6316_11	H	USA		Chronic			HM215438
